# Supplementary material for: Epoxidation of ethylene over Pt-, Pd- and Ni-doped graphene in the presence of N2O as an oxidant: a comparative DFT study
Source: Royal Society of Chemistry journal article supplement (doi:10.1039/c7nj01089c), 2017-01-01
Supplement: c7nj01089c1.pdf [file c7nj01089c1.pdf]

# “Supporting Information”

## **Epoxidation of ethylene over Pt-, Pd- and Ni-doped graphene in the presence of N<sub>2</sub>O as an oxidant: A comparative DFT study**

**Mehdi D. Esrafil<sup>a,\*</sup>, Nasibeh Saeidi<sup>a</sup>, Leila Dinparast<sup>b</sup>**

<sup>a</sup> Laboratory of Theoretical Chemistry, Department of Chemistry, University of Maragheh, Maragheh, Iran

<sup>b</sup> Biotechnology Research Center, Tabriz University of Medical Sciences, Tabriz, Iran

\* Corresponding author. **Tel:** (+98) 4212237955. **E-mail:** [esrafil@maragheh.ac.ir](mailto:esrafil@maragheh.ac.ir) (Mehdi D. Esrafil).

**Figure S1.** The energy diagram for the diffusion of M= Pt, Pd or Ni atom on the M-doped graphene sheet. The IS, TS and P represent initial structure, transition structure and final product, respectively.

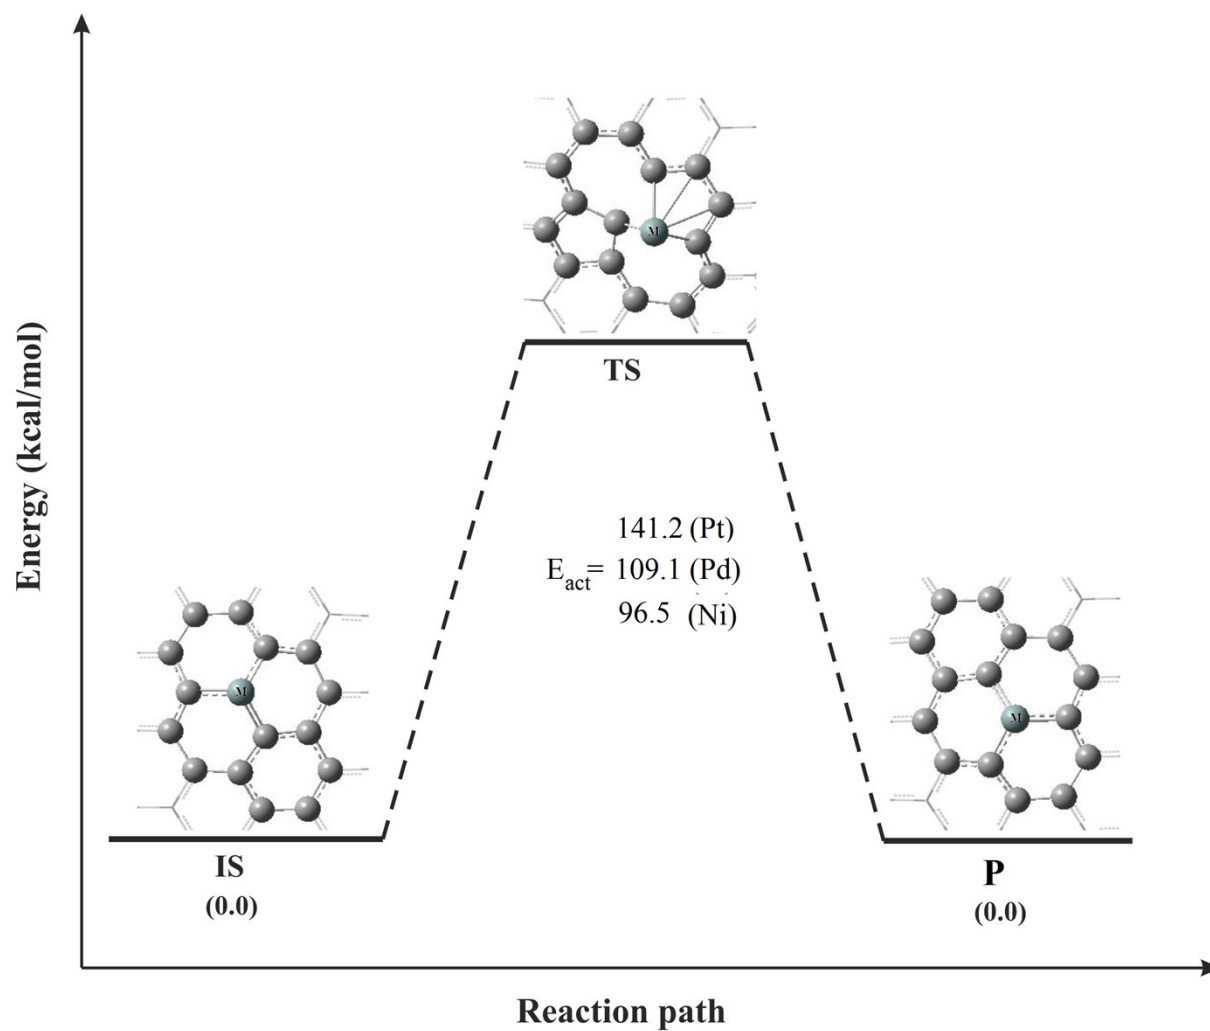

**Figure S2.** The large model used for the M-doped graphene (M=Ni, Pd and Pt)

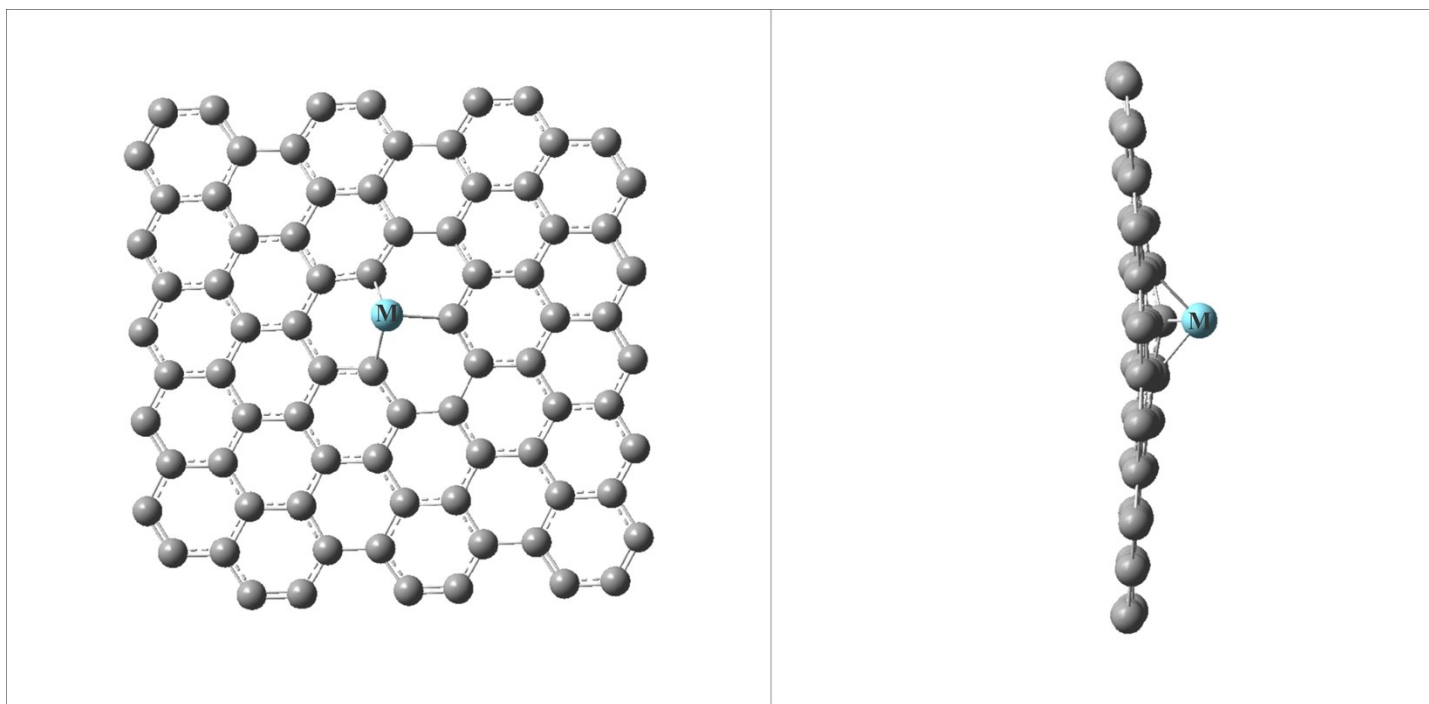

**Table S1.** Calculated (M06-2X/6-311+G\*/LANL2DZ) adsorption energy ( $E_{\text{ads}}$ ) for the adsorption/co-adsorption of  $\text{N}_2\text{O}$  and  $\text{C}_2\text{H}_4$  molecules over Pt-/Pd-/Ni-G surfaces

| Complex            | $E_{\text{ads}}$ (kcal mol <sup>-1</sup> ) |
|--------------------|--------------------------------------------|
| <i><b>Pt-G</b></i> |                                            |
| <b>A</b>           | -15.1                                      |
| <b>B</b>           | -5.0                                       |
| <b>G</b>           | -25.3                                      |
| <i><b>Pd-G</b></i> |                                            |
| <b>C</b>           | -10.1                                      |
| <b>D</b>           | -9.2                                       |
| <b>H</b>           | -19.7                                      |
| <i><b>Ni-G</b></i> |                                            |
| <b>E</b>           | -7.5                                       |
| <b>F</b>           | -6.4                                       |
| <b>I</b>           | -16.5                                      |

**Table S2.** Calculated adsorption energy ( $E_{\text{ads}}$ ) for the adsorption/co-adsorption of  $\text{N}_2\text{O}$  and  $\text{C}_2\text{H}_4$  molecules over the large Pt-/Pd-/Ni-G model

| Complex            | $E_{\text{ads}}$ (kcal mol <sup>-1</sup> ) |
|--------------------|--------------------------------------------|
| <b><i>Pt-G</i></b> |                                            |
| <b>A</b>           | -15.5                                      |
| <b>B</b>           | -5.3                                       |
| <b>G</b>           | -26.1                                      |
| <b><i>Pd-G</i></b> |                                            |
| <b>C</b>           | -10.6                                      |
| <b>D</b>           | -9.6                                       |
| <b>H</b>           | -20.3                                      |
| <b><i>Ni-G</i></b> |                                            |
| <b>E</b>           | -8.0                                       |
| <b>F</b>           | -6.8                                       |
| <b>I</b>           | -16.9                                      |
